# Supplementary material for: Inside-mode indium oxide/carbon nanotubes for efficient carbon dioxide electroreduction by suppressing hydrogen evolution
Source: Royal Society of Chemistry journal article supplement (doi:10.1039/d0cc07417a), 2020-12-22
Supplement: d0cc07417a1.pdf [file d0cc07417a1.pdf]

## Supporting Information

### **Inside-Mode Indium Oxide/Carbon Nanotube for Efficient Carbon Dioxide Electroreduction by Suppressing Hydrogen Evolution**

Haichuan He,<sup>ab</sup> Congcheng Yang,<sup>a</sup> Liu Deng,<sup>\*ab</sup> Jian Wu,<sup>a</sup> Fei Chen,<sup>a</sup> Jianhan Huang<sup>a</sup> and You-Nian Liu<sup>\*ab</sup>

<sup>a</sup> Hunan Provincial Key Laboratory of Micro & Nano Materials Interface Science, College of Chemistry and Chemical Engineering, Central South University, Changsha, Hunan 410083, China

<sup>b</sup> State Key Laboratory for Powder Metallurgy, Central South University, Changsha, Hunan 410083, China

## 1. Experimental Section

**Materials:** Indium nitrate hydrate ( $\text{In}(\text{NO}_3)_3 \cdot x\text{H}_2\text{O}$ ), 1,4-benzenedicarboxylic acid ( $\text{H}_2\text{BDC}$ ), N,N-dimethyl-formamide (DMF), ethanol, and potassium bicarbonate ( $\text{KHCO}_3$ ) were purchased from Sinopharm (Shanghai, China). Dimethyl sulfoxide (DMSO), multiwalled carbon nanotubes (MWCNTs), Nafion solution, and Nafion@117 film were obtained from Sigma-Aldrich.  $\text{CO}_2$  (99.99%),  $\text{N}_2$  (99.99%) were purchased from Saizhong Gas (Changsha, China).

**Materials synthesis:** MWCNTs@MIL-68 precursor was synthesized by a typical method with slight modifications. Briefly, 90 mg of  $\text{In}(\text{NO}_3)_3 \cdot x\text{H}_2\text{O}$  and 0.9 mg of MWCNTs were dissolved in 40 mL of DMF and stirred for 2 h. Then, 110 mg of  $\text{H}_2\text{BDC}$  were added into the above solution under stirring for 10 min. Subsequently, the solution was kept standing in an oil bath at 120 °C for 30 min. After the completion of the reaction, the precipitate was washed with ethanol for three times and dried at 60 °C for 12 h. MIL-68 hexagonal prism was synthesized with the same method as MWCNTs@MIL-68 but without addition of MWCNTs. MWCNTs@ $\text{In}_2\text{O}_3$  composite was synthesized by pyrolysis of MWCNTs@MIL-68 hexagonal prisms in a tube furnace at 350 °C under air atmosphere for 1 h. MIL-68-derived- $\text{In}_2\text{O}_3$  was prepared by the same procedure using MIL-68. MWCNTs/ $\text{In}_2\text{O}_3$  is physically mixed MIL-68-derived  $\text{In}_2\text{O}_3$  and MWCNTs.

**Characterizations of materials:** Microstructures were determined with a Helios NanoLab 600i Dual Beam FIB/FE-SEM (FEI, USA). The transmission electron microscopy (TEM) images were obtained on a FEI Titan G2 60–300 (FEI, USA) with spherical aberration correction. Powder X-ray diffraction (XRD) patterns were identified by a Rigaku D/max 2550 X-ray diffractometer with  $\text{Cu K}\alpha$  radiation ( $\lambda=0.15418$  nm) (Rigaku, Japan). X-ray photoelectron spectroscopy (XPS) were gained from ESCALAB 250Xi (Thermo Fisher Scientific, USA) with  $\text{Al K}\alpha$  radiation as the X-ray source.

**Electrochemical measurements:** All the electrochemical measurements were evaluated in CO<sub>2</sub>-saturated 0.5 M KHCO<sub>3</sub> solution within a Nafion-membrane separated airtight H-type cell. The Ag/AgCl electrode and Pt electrode were used as the reference electrode and counter electrode, respectively. The electrocatalysts were modified on carbon papers of 1 cm × 1 cm as working electrode. Typically, 10 mg of electrocatalyst and 50 μL of Nafion solution (5 wt%) were dispersed in 5 mL of ethanol by sonicating for 20 min to form a homogeneous catalyst ink. Then, 500 μL the catalyst ink was uniformly deposited on carbon papers to act as the working electrode. The potential was calculated to the reversible hydrogen electrode (RHE).

$$E(\text{RHE}) = E(\text{Ag/AgCl}) + 0.1989 \text{ V} + 0.059 \times \text{pH}.$$

Before the CO<sub>2</sub> reduction experiments, the solution was bubbled with gas (CO<sub>2</sub> or N<sub>2</sub>) for at least 30 min to make the aqueous solution saturated. The linear sweep voltammetry (LSV) was performed in CO<sub>2</sub>-saturated and N<sub>2</sub>-saturated 0.5 M KHCO<sub>3</sub> aqueous solution from 0 to -1.2 V vs. RHE at a scan rate of 50 mV s<sup>-1</sup>. The electrochemical CO<sub>2</sub> reduction reaction was carried out in CO<sub>2</sub>-saturated 0.5 M KHCO<sub>3</sub> electrolyte (pH = 7.2) in the potential range of -0.6 to -1.2 V vs. RHE at room temperature. Cyclic voltammogram measurements were conducted from 0.2 to 0.3 V vs. RHE with various scan rates (5, 10, 15, 20, 25 and 30 mV s<sup>-1</sup>) to obtain the double layer capacitance (C<sub>dl</sub>). The electrochemically active surface area (ECSA) of the working electrodes were calculated according to the following equation:

$$\text{ECSA} = R_f S,$$

where  $R_f$  is the roughness factor,  $S$  is the geometric area of the working electrode. The  $R_f$  can be determined by the relation  $R_f = C_{dl}/60 \mu\text{F cm}^{-2}$  based on the  $C_{dl}$  of a smooth oxide surface.

**Computational Method:** Gibbs free energies of electrochemical CO<sub>2</sub> reduction reaction states were performed using codes from Vienna Ab-initio Simulation Package (VASP),<sup>1, 2</sup> taking advantage of the density functional theory (DFT) with the Projected Augmented Wave (PAW) method.<sup>3</sup> The revised Perdew-Burke-Ernzerhof (RPBE) functional was used to describe the exchange and correlation effects.<sup>4-6</sup> For all the geometry optimizations, the cutoff energy was set to be 500 eV. The Monkhorst-Pack method were set to be 2 × 2 × 1 for performing the calculations on In<sub>2</sub>O<sub>3</sub> and MWCNTs@ In<sub>2</sub>O<sub>3</sub>. A 15 Å vacuum thickness was added in the z-direction of the simulation box, preventing the interactions between the adjacent slabs.

In aqueous conditions, the reduction of CO<sub>2</sub> to produce HCOO<sup>-</sup> could occur in the following three elementary steps:

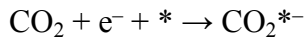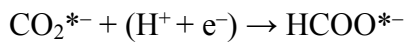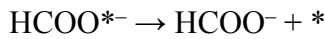

where \* denotes the active sites on the catalyst surface. The computational hydrogen electrode (CHE) model proposed by Norskov et al. was used to calculate the free energies of the reaction intermediates, based on which the free energy of an adsorbed species is defined as,<sup>7</sup>

$$\Delta G_{ads} = \Delta E_{ads} + \Delta E_{ZPE} - T\Delta S_{ads} + \int C_p dT$$

where  $\Delta E_{ads}$  is the electronic adsorption energy,  $\Delta E_{ZPE}$  is the zero-point energy difference between adsorbed and gaseous species,  $T\Delta S_{ads}$  is the corresponding entropy difference between these two states, and  $\int C_p dT$  is the enthalpy correction. The electronic binding energy is referenced as graphene for each C atom,  $\frac{1}{2}$  H<sub>2</sub> for each H atom, and (H<sub>2</sub>O-H<sub>2</sub>) for each O atom, plus the energy of the clean slab. The corrections of zero-point energy, entropy, and enthalpy of adsorbed and gaseous species can be found in the supporting information.

## 2. Supplementary Figures

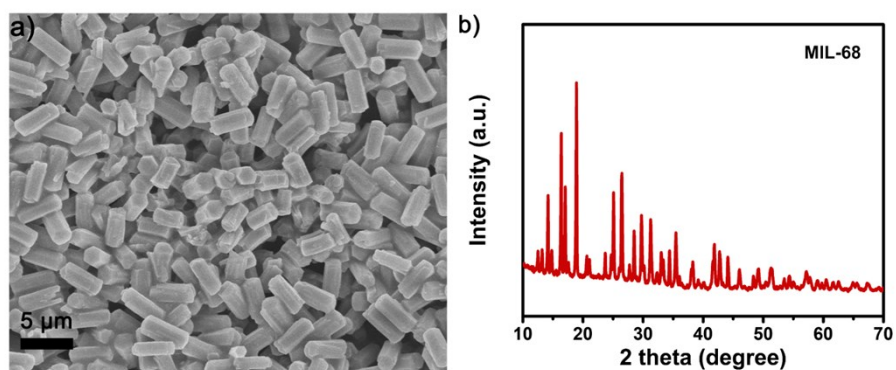

Fig. S1 a) SEM image and b) XRD pattern of the MIL-68 hexagonal prisms.

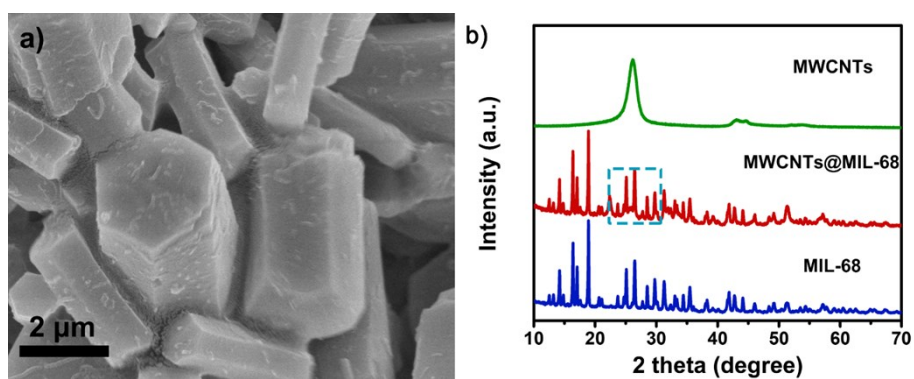

Fig. S2 a) SEM image and b) XRD pattern of MWCNTs@MIL-68.

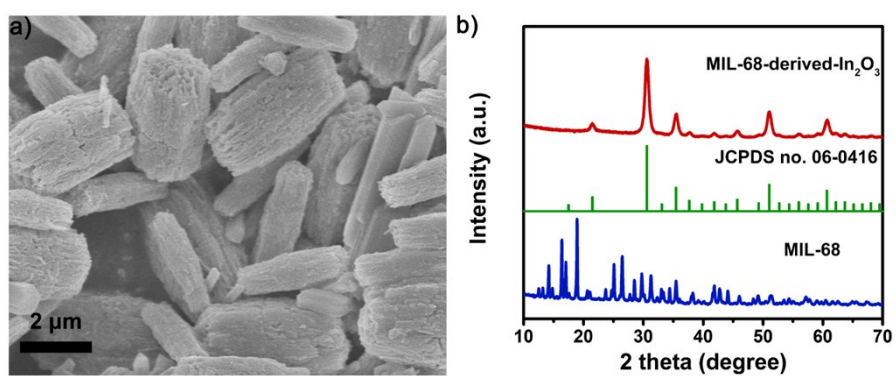

Fig. S3 a) SEM image and b) XRD pattern of MIL-68-derived-In<sub>2</sub>O<sub>3</sub>.

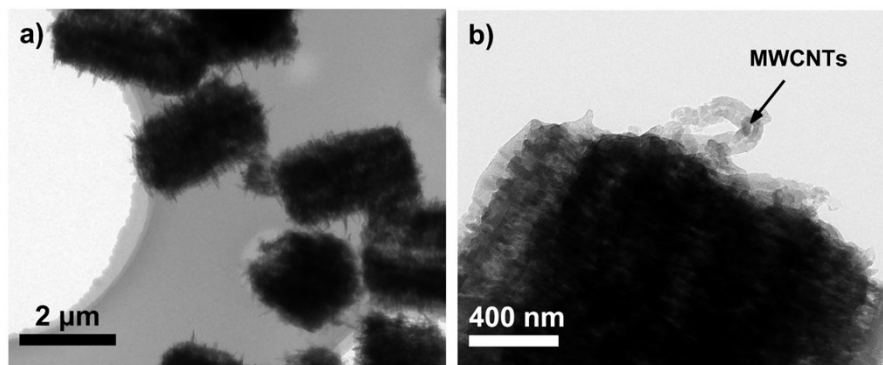

Fig. S4 TEM image of MWCNTs@In<sub>2</sub>O<sub>3</sub>.

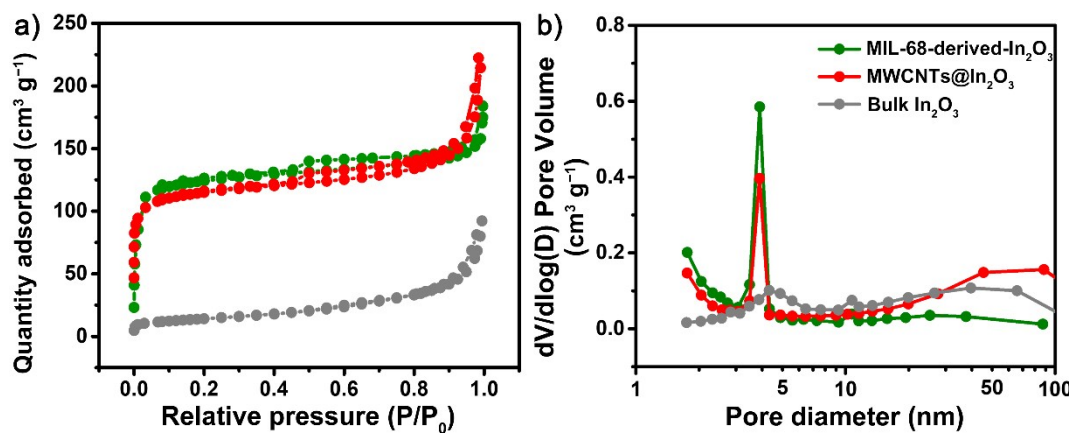

Fig. S5 a) N<sub>2</sub> adsorption-desorption isotherms and b) Pore size distributions of MIL-68-derived-In<sub>2</sub>O<sub>3</sub>, MWCNTs@In<sub>2</sub>O<sub>3</sub> and bulk In<sub>2</sub>O<sub>3</sub>.

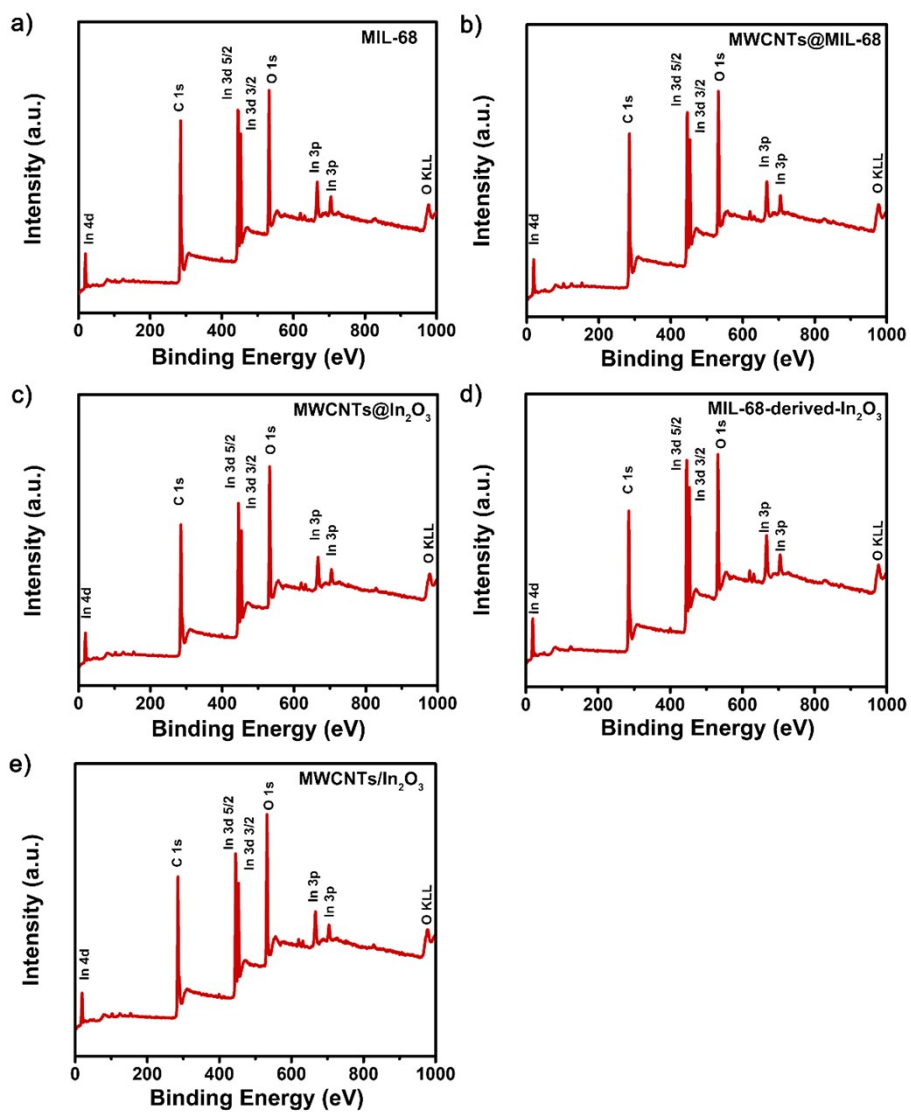

**Fig. S6** XPS spectrum of a) MIL-68, b) MWCNTs@MIL-68, c) MWCNTs@In<sub>2</sub>O<sub>3</sub>, d) MIL-68-derived-In<sub>2</sub>O<sub>3</sub> and e) MWCNTs/In<sub>2</sub>O<sub>3</sub>.

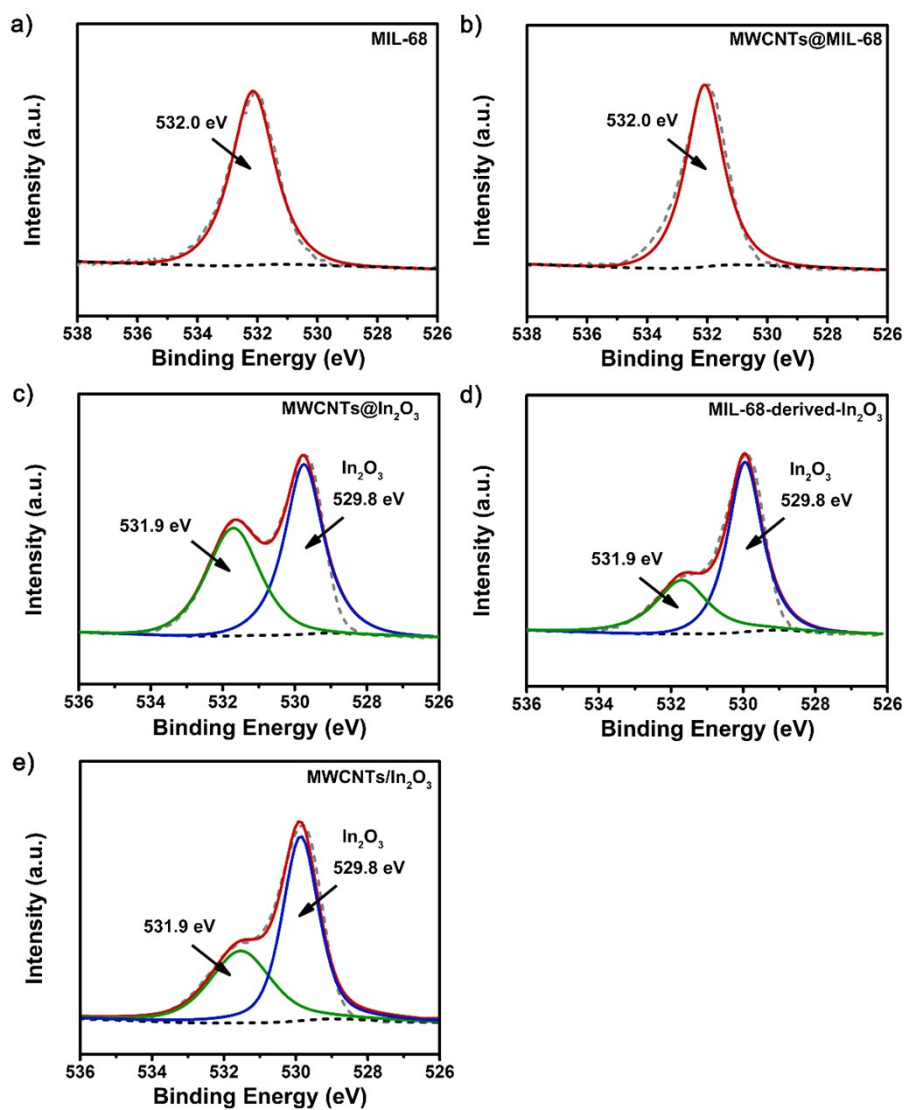

**Fig. S7** O 1s XPS spectrum of a) MIL-68, b) MWCNTs@MIL-68, c) MWCNTs@In<sub>2</sub>O<sub>3</sub>, d) MIL-68-derived-In<sub>2</sub>O<sub>3</sub> and e) MWCNTs/In<sub>2</sub>O<sub>3</sub>.



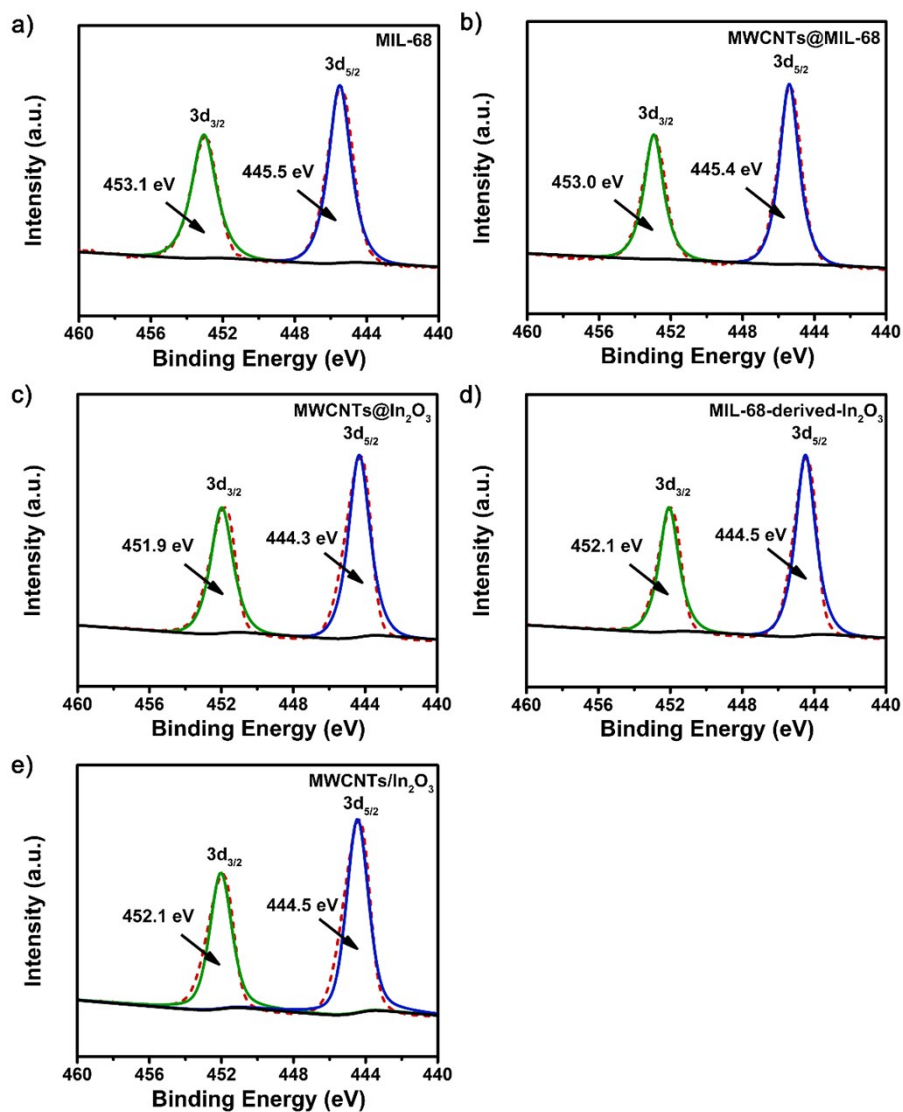

**Fig. S8** In 3d XPS spectrum of a) MIL-68, b) MWCNTs@MIL-68, c) MWCNTs@In<sub>2</sub>O<sub>3</sub>, d) MIL-68-derived-In<sub>2</sub>O<sub>3</sub> and e) MWCNTs/In<sub>2</sub>O<sub>3</sub>.

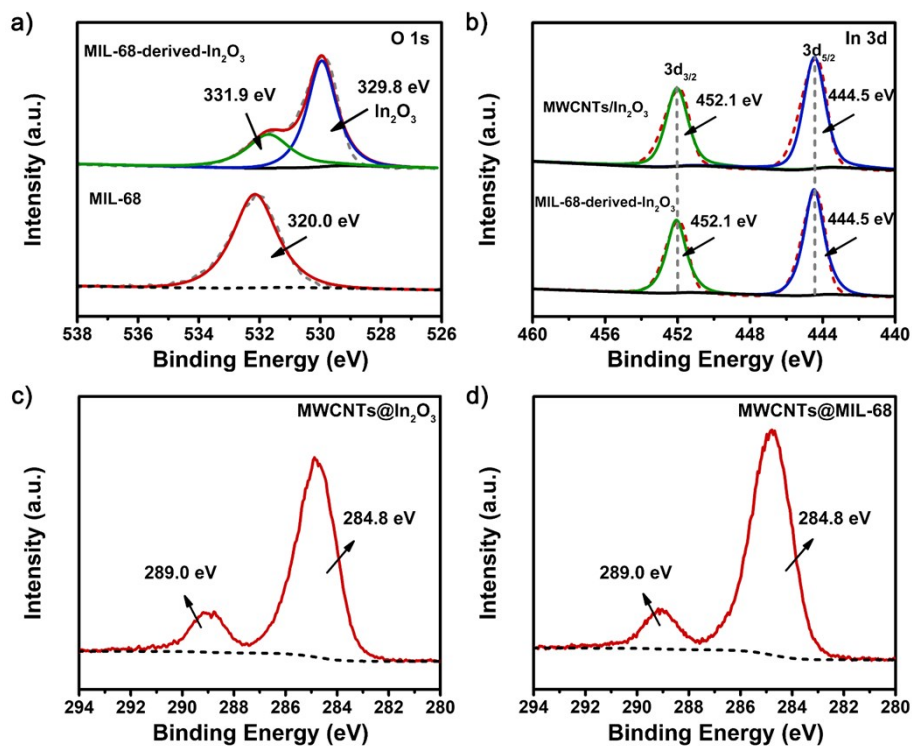

**Fig. S9** a) O 1s XPS spectra of MIL-68 and MIL-68-derived-In<sub>2</sub>O<sub>3</sub>. b) In 3d XPS spectra of MWCNTs/In<sub>2</sub>O<sub>3</sub> and MIL-68-derived-In<sub>2</sub>O<sub>3</sub>. c) C 1s XPS spectra of c) MWCNTs@In<sub>2</sub>O<sub>3</sub> and d) MWCNTs@MIL-68.

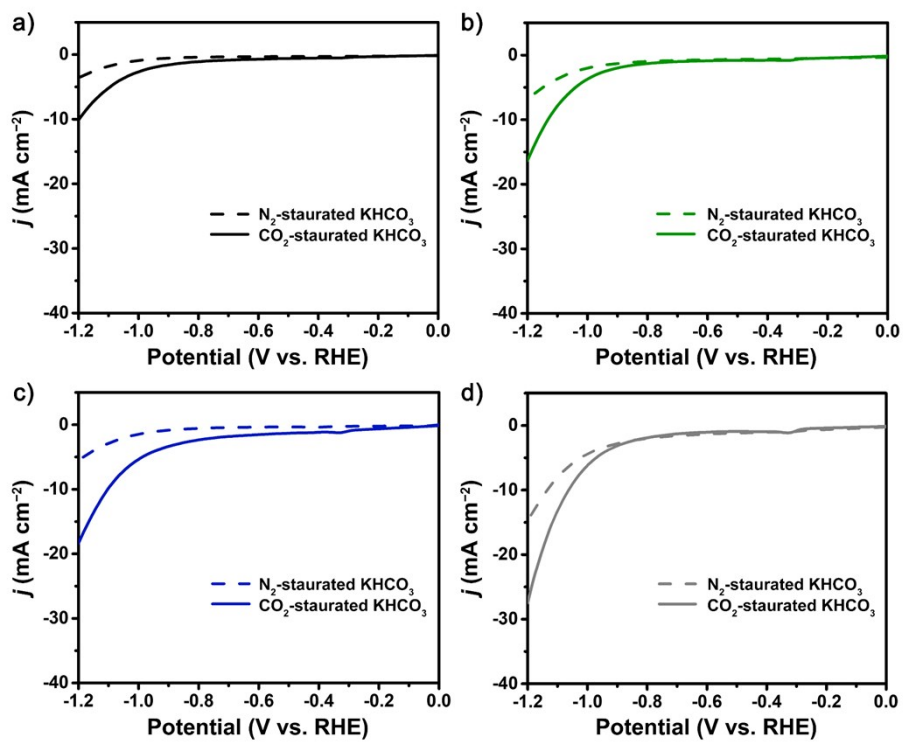

**Fig. S10** LSV curves of a) MIL-68, b) MWCNTs@MIL-68, c) MIL-68-derived-In<sub>2</sub>O<sub>3</sub> and d) MWCNTs/In<sub>2</sub>O<sub>3</sub>.

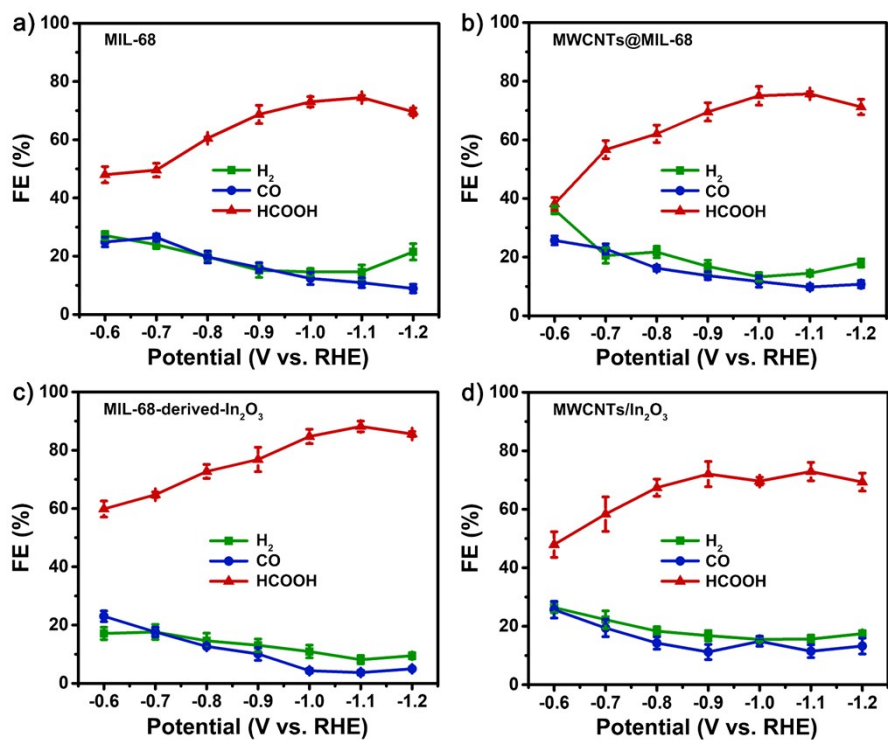

**Fig. S11** FE of a) MIL-68, b) MWCNTs@MIL-68, c) MIL-68-derived-In<sub>2</sub>O<sub>3</sub> and d) MWCNTs/In<sub>2</sub>O<sub>3</sub>.

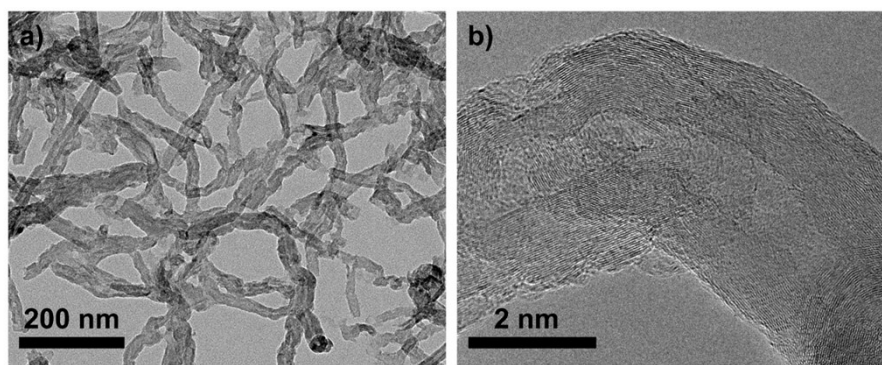

**Fig. S12** a) TEM image and b) high-resolution TEM image of MWCNTs.

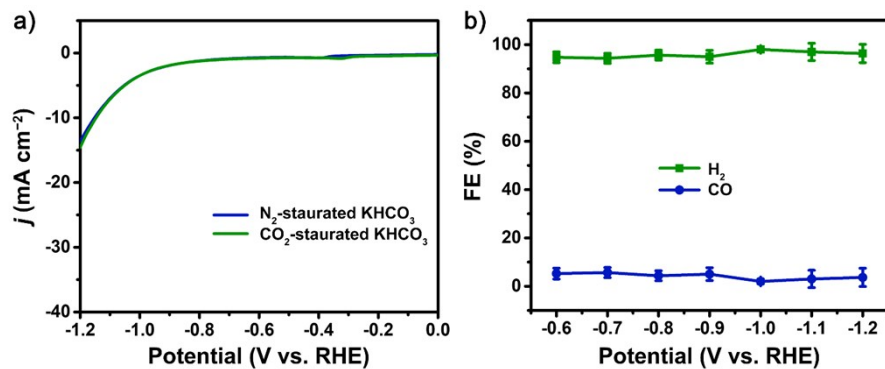

Fig. S13 a) LSV curves and b) FE of MWCNTs.

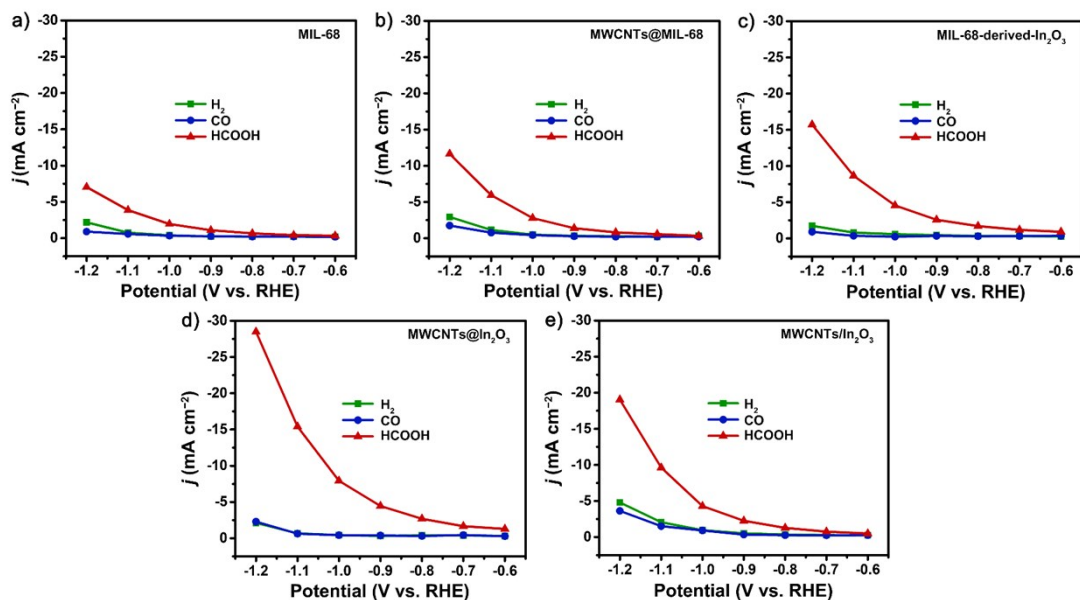

Fig. S14 Partial current density of a) MIL-68, b) MWCNTs@MIL-68, c) MIL-68-derived-In<sub>2</sub>O<sub>3</sub>, d) MWCNTs@In<sub>2</sub>O<sub>3</sub> and e) MWCNTs/In<sub>2</sub>O<sub>3</sub>.

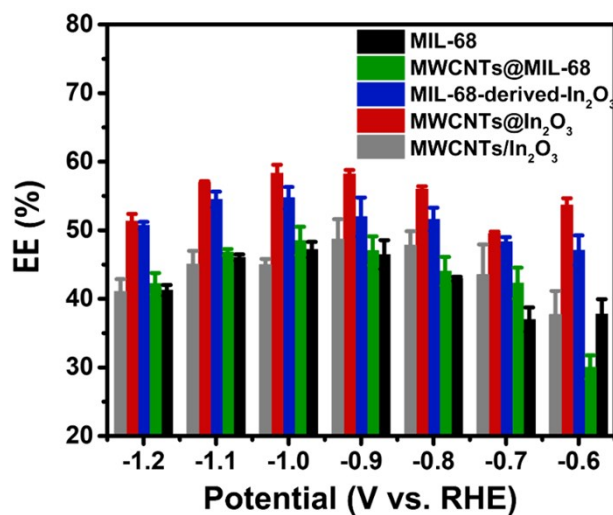

**Fig. S15** Energy efficiency (EE) of MIL-68, MWCNTs@MIL-68, MIL-68-derived-In<sub>2</sub>O<sub>3</sub>, MWCNTs@In<sub>2</sub>O<sub>3</sub> and MWCNTs/In<sub>2</sub>O<sub>3</sub>.

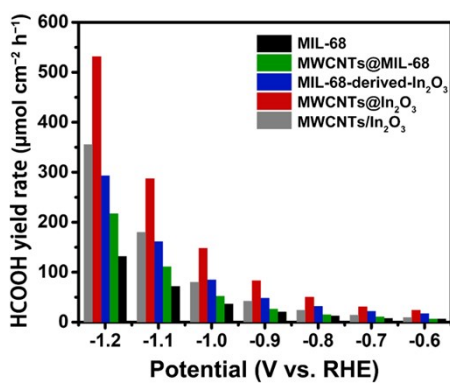

**Fig. S16** HCOOH yield rate of MIL-68, MWCNTs@MIL-68, MIL-68-derived-In<sub>2</sub>O<sub>3</sub>, MWCNTs@In<sub>2</sub>O<sub>3</sub> and MWCNTs/In<sub>2</sub>O<sub>3</sub>.

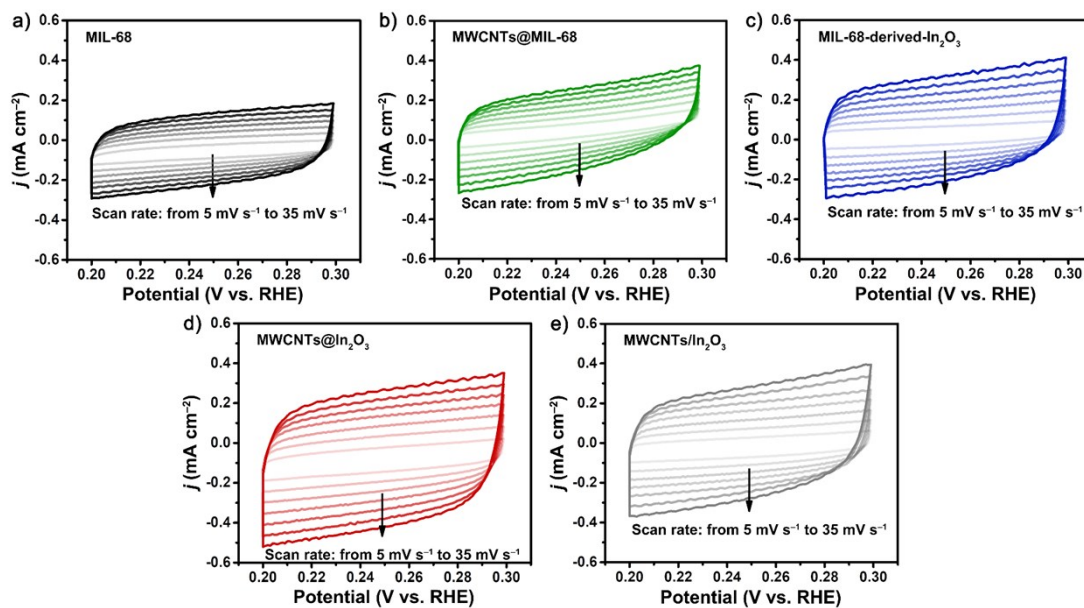

**Fig. S17** Cyclic voltammograms curves of a) MIL-68, b) MWCNTs@MIL-68, c) MIL-68-derived-In<sub>2</sub>O<sub>3</sub>, d) MWCNTs@In<sub>2</sub>O<sub>3</sub> and e) MWCNTs/In<sub>2</sub>O<sub>3</sub>.

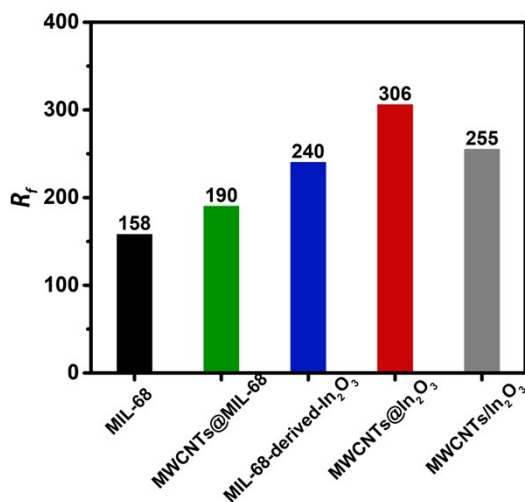

**Fig. S18**  $R_f$  of MIL-68, MWCNTs@MIL-68, MIL-68-derived-In<sub>2</sub>O<sub>3</sub>, MWCNTs@In<sub>2</sub>O<sub>3</sub> and MWCNTs/In<sub>2</sub>O<sub>3</sub>.

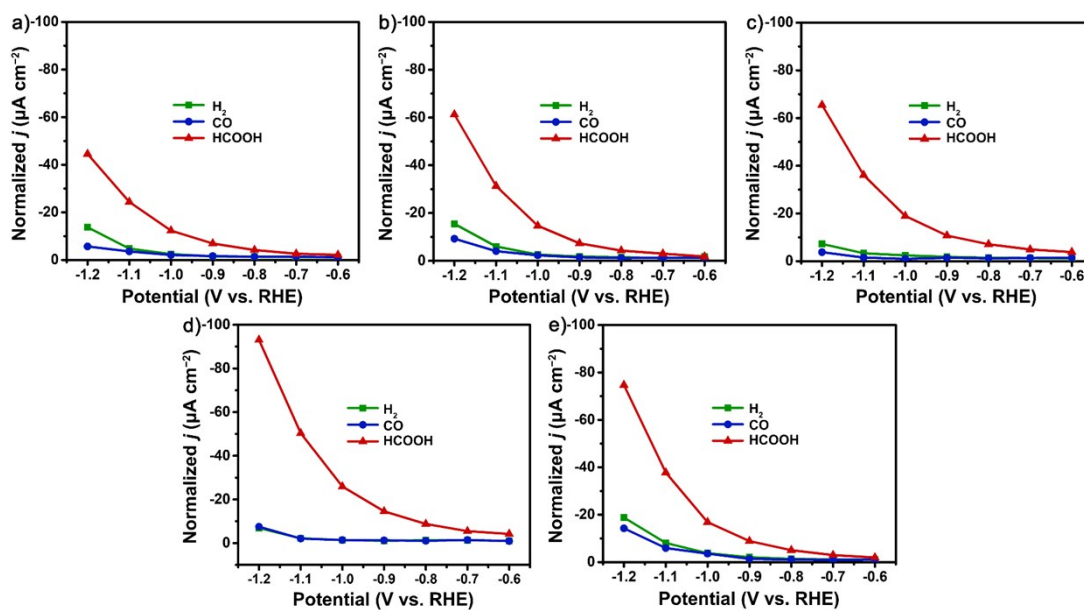

**Fig. S19** ECSA-normalized partial current density of a) MIL-68, b) MWCNTs@MIL-68, c) MIL-68-derived-In<sub>2</sub>O<sub>3</sub>, d) MWCNTs@In<sub>2</sub>O<sub>3</sub> and e) MWCNTs/In<sub>2</sub>O<sub>3</sub>.

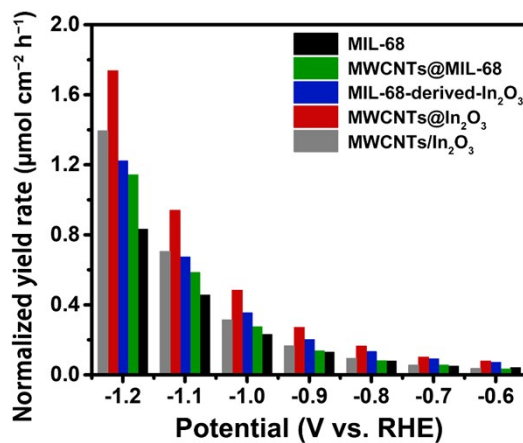

**Fig. S20** ECSA-normalized HCOOH yield rate of MIL-68, MWCNTs@MIL-68, MIL-68-derived-In<sub>2</sub>O<sub>3</sub>, MWCNTs@In<sub>2</sub>O<sub>3</sub> and MWCNTs/In<sub>2</sub>O<sub>3</sub>.



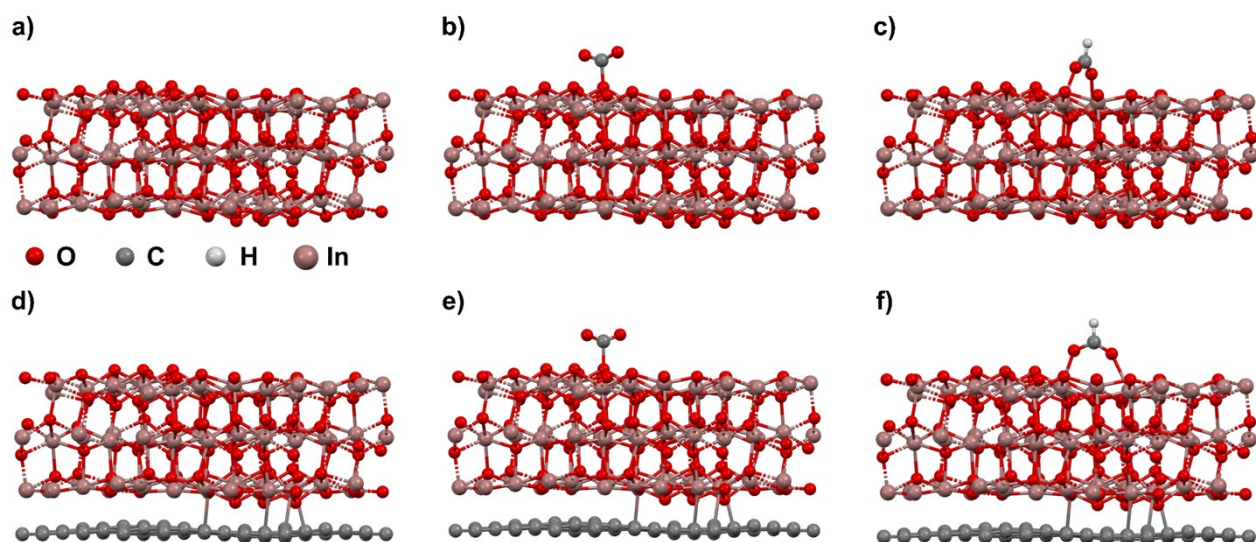

**Fig. S21** a) and d) Crystal structure model of  $\text{In}_2\text{O}_3$  and  $\text{MWCNTs@In}_2\text{O}_3$ , respectively. b) and e) Configuration of  $\text{CO}_2^{*-}$  adsorption of  $\text{In}_2\text{O}_3$  and  $\text{MWCNTs@In}_2\text{O}_3$ , respectively. c) and f) Configuration of  $\text{HCOO}^{*-}$  of  $\text{In}_2\text{O}_3$  and  $\text{MWCNTs@In}_2\text{O}_3$ , respectively.

## Supplementary Table

**Table S1.** Comparison of the performance of eCO<sub>2</sub>RR on different catalysts.

| Catalyst                                           | Product | <i>E</i><br>(V vs. RHE) | <i>j</i> <sub>product</sub><br>(mA cm <sup>-2</sup> ) | <i>FE</i><br>(%) | <i>EE</i><br>(%) | Yield rate<br>(μmol cm <sup>-2</sup> h <sup>-1</sup> ) | Ref          |
|----------------------------------------------------|---------|-------------------------|-------------------------------------------------------|------------------|------------------|--------------------------------------------------------|--------------|
| Bi <sub>2</sub> O <sub>3</sub> -NGQDs              | HCOOH   | -1.21                   | -29.3                                                 | 90.8             | 53.6             | 546.6                                                  | 8            |
| SnS <sub>2</sub> -rGO                              | HCOOH   | -0.89                   | -11.7                                                 | 84.5             | 57.4             | 218.3                                                  | 9            |
| SrSnO <sub>3</sub> NWs                             | HCOOH   | -1.1                    | -17.3                                                 | 80.5             | 49.8             | 332.7                                                  | 10           |
| Zn <sub>2</sub> SnO <sub>4</sub> /SnO <sub>2</sub> | HCOOH   | -1.08                   | -5.72                                                 | 77.0             | 48.0             | 106.7                                                  | 11           |
| CuSnNWs/C-Air                                      | HCOOH   | -1.0                    | -17.33                                                | 90.2             | 58.1             | 323.3                                                  | 12           |
| H-InO <sub>x</sub> NRs                             | HCOOH   | -0.8                    | -7.0                                                  | 90.2             | 63.9             | 130.6                                                  | 13           |
| Ag <sub>76</sub> Sn <sub>24</sub>                  | HCOOH   | -0.8                    | -15.6                                                 | 80.0             | 56.3             | 291.0                                                  | 14           |
| Sn-pNWs                                            | HCOOH   | -0.8                    | -4.8                                                  | 80.1             | 56.4             | 89.6                                                   | 15           |
| Dendritic Cu <sub>0.2</sub> In <sub>0.8</sub>      | HCOOH   | -1.0                    | -0.73                                                 | 62.0             | 36.7             | 13.62                                                  | 16           |
| SnO <sub>2</sub> QWs                               | HCOOH   | -1.16                   | -13.7                                                 | 88.0             | 53.1             | 255.6                                                  | 17           |
| In <sub>2</sub> O <sub>3</sub> -rGO                | HCOOH   | -1.2                    | -22.2                                                 | 84.6             | 50.1             | 414.1                                                  | 18           |
| Bi <sub>2</sub> O <sub>3</sub> NSs@MCCM            | HCOOH   | -1.26                   | -15.0                                                 | 93.8             | 54.3             | 279.0                                                  | 19           |
| NiSA-N-CNTs                                        | CO      | -0.7                    | -23.2                                                 | 91.3             | 64.7             | 432.7                                                  | 20           |
| CoPc/CNT                                           | CO      | -0.63                   | -10.0                                                 | 92.0             | 67.6             | 186.6                                                  | 21           |
| MWCNTs@In <sub>2</sub> O <sub>3</sub>              |         | -1.0                    | -7.9                                                  | 90.3             | 58.3             | 147.9                                                  | This<br>work |
|                                                    |         | -1.1                    | -15.4                                                 | 92.2             | 57.0             | 287.4                                                  |              |
|                                                    |         | -1.2                    | -28.5                                                 | 86.7             | 51.3             | 531.5                                                  |              |

**Table S2.** The correction of zero-point energy, enthalpy effect and entropy effect of the adsorbed and gaseous species.

|                 | ZPE (eV) | $\int C_p dT$ (eV) | TS (eV) |
|-----------------|----------|--------------------|---------|
| HCOO*           | 0.62     | 0.10               | -0.23   |
| CO <sub>2</sub> | 0.31     | 0.10               | 0.65    |
| HCOOH           | 0.90     | 0.11               | -1.02   |

## References

1. G. Kresse and J. Furthmüller, *Phys. Rev. B*, 1996, **54**, 11169-11186.
2. G. Kresse and J. Hafner, *Phys. Rev. B*, 1994, **49**, 14251-14269.
3. P. E. Blöchl, *Phys. Rev. B*, 1994, **50**, 17953-17979.
4. J. P. Perdew, K. Burke and M. Ernzerhof, *Phys. Rev. Lett.*, 1996, **77**, 3865-3868.
5. Y. Zhang and W. Yang, *Phys. Rev. Lett.*, 1998, **80**, 890-890.
6. B. Hammer, L. B. Hansen and J. K. Nørskov, *Phys. Rev. B*, 1999, **59**, 7413-7421.
7. J. K. Nørskov, J. Rossmeisl, A. Logadottir, L. Lindqvist, J. R. Kitchin, T. Bligaard and H. Jónsson, *J. Phys. Chem. B*, 2004, **108**, 17886-17892.
8. Z. Chen, K. Mou, X. Wang and L. Liu, *Angew. Chem. Int. Ed.*, 2018, **57**, 12790-12794.
9. F. Li, L. Chen, M. Xue, T. Williams, Y. Zhang, D. R. MacFarlane and J. Zhang, *Nano Energy*, 2017, **31**, 270-277.
10. Y. Pi, J. Guo, Q. Shao and X. Huang, *Nano Energy*, 2019, **62**, 861-868.
11. K. Wang, D. Liu, P. Deng, L. Liu, S. Lu, Z. Sun, Y. Ma, Y. Wang, M. Li, B. Y. Xia, C. Xiao and S. Ding, *Nano Energy*, 2019, **64**, 103954.
12. J. Wang, Y. Ji, Q. Shao, R. Yin, J. Guo, Y. Li and X. Huang, *Nano Energy*, 2019, **59**, 138-145.
13. J. Zhang, R. Yin, Q. Shao, T. Zhu and X. Huang, *Angew. Chem. Int. Ed.*, 2019, **58**, 5609-5613.
14. W. Luc, C. Collins, S. Wang, H. Xin, K. He, Y. Kang and F. Jiao, *J. Am. Chem. Soc.*, 2017, **139**, 1885-1893.
15. B. Kumar, V. Atla, J. P. Brian, S. Kumari, T. Q. Nguyen, M. Sunkara and J. M. Spurgeon, *Angew. Chem. Int. Ed.*, 2017, **56**, 3645-3649.
16. Z. B. Hoffman, T. S. Gray, K. B. Moraveck, T. B. Gunnoe and G. Zangari, *ACS Catal.*, 2017, **7**, 5381-5390.
17. S. Liu, J. Xiao, X. F. Lu, J. Wang, X. Wang and X. W. D. Lou, *Angew. Chem. Int. Ed.*, 2019, **58**, 8499-8503.
18. Z. Zhang, F. Ahmad, W. Zhao, W. Yan, W. Zhang, H. Huang, C. Ma and J. Zeng, *Nano Lett.*, 2019, **19**, 4029-4034.
19. S. Liu, X. F. Lu, J. Xiao, X. Wang and X. W. D. Lou, *Angew. Chem. Int. Ed.*, 2019, **58**, 13828-13833.
20. Y. Cheng, S. Zhao, B. Johannessen, J. P. Veder, M. Saunders, M. R. Rowles, M. Cheng, C. Liu, M. F. Chisholm, R. De Marco, H. M. Cheng, S. Z. Yang and S. P. Jiang, *Adv. Mater.*, 2018, **30**, e1706287.
21. X. Zhang, Z. Wu, X. Zhang, L. Li, Y. Li, H. Xu, X. Li, X. Yu, Z. Zhang, Y. Liang and H. Wang, *Nat. Commun.*, 2017, **8**, 14675.
